# Supplementary material for: Vectofusin-1, a New Viral Entry Enhancer, Strongly Promotes Lentiviral Transduction of Human Hematopoietic Stem Cells
Source: PubMed Central journal article supplement — Mol Ther Nucleic Acids. 2013 May 7;2(5):e90–. doi: 10.1038/mtna.2013.17 (PMC4817938; doi:10.1038/mtna.2013.17), 2013-05-07
Supplement: mtna201317x1.pdf [file mtna201317x1.pdf]

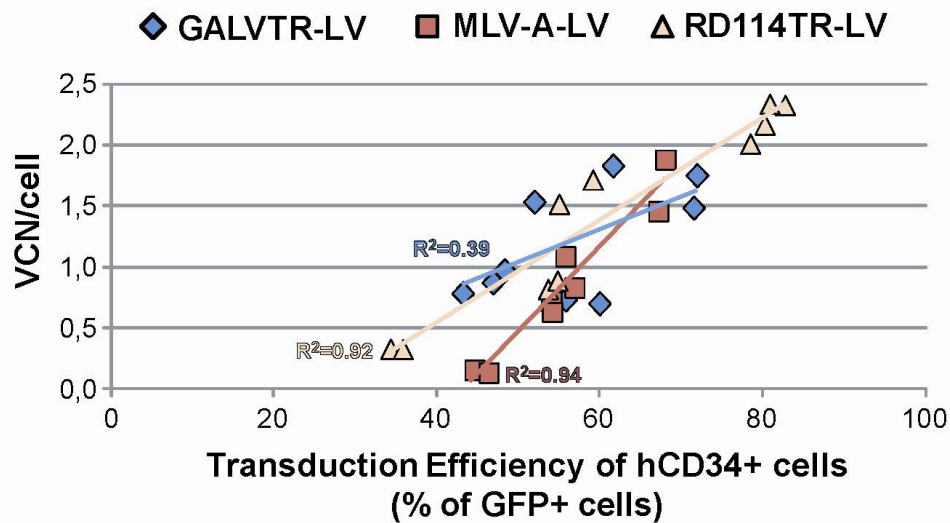

**Figure S1. Determination of the VCN in hCD34+ cells transduced with various lentiviral pseudotypes.** Pre-activated hCD34+ cells were transduced 6 hours with various titers of GALVTR-LV (diamond), MLV-A-LV (square) or RD114TR-LV (triangle) in presence of Vectofusin-1 (12 $\mu$ g/ml). After 5 days, transduction efficiencies were determined by monitoring the percentage of GFP+ cells. Next, hCD34+ cell genomic DNAs were extracted and the VCN values were determined using Taqman qPCR on HIV-1 Psi sequence normalized to albumin gene expression levels. For each lentiviral pseudotype, the fitting curve and the correlation coefficient is represented.
