# Supplementary material for: Vectofusin-1, a New Viral Entry Enhancer, Strongly Promotes Lentiviral Transduction of Human Hematopoietic Stem Cells
Source: PubMed Central journal article supplement — Mol Ther Nucleic Acids. 2013 May 7;2(5):e90–. doi: 10.1038/mtna.2013.17 (PMC4817938; doi:10.1038/mtna.2013.17), 2013-05-07
Supplement: mtna201317x2.pdf [file mtna201317x2.pdf]

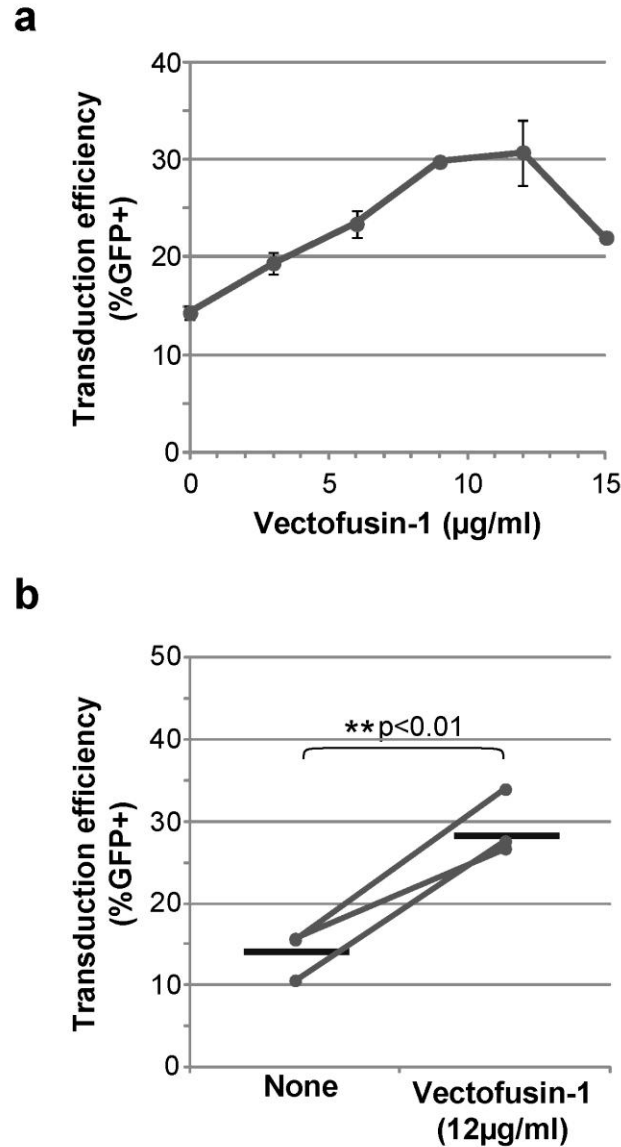

**Figure S2. Transduction of hCD34+ cells isolated from G-CSF mobilized peripheral blood (MPB) in presence of Vectofusin-1.** (a) hCD34+ cells isolated from an MPB donor were transduced in duplicate with purified VSV-G-LVs ( $5 \times 10^7$  ig/ml, MOI 400) in the absence or presence of various concentrations of Vectofusin-1. Transduction efficiencies are represented as the average percentage of GFP+ cells  $\pm$  SD obtained 4 days post-infection. (b) hCD34+ cells from three independent MPB donors were transduced in duplicate with purified VSV-G-LVs as in (a), in the absence (none) or presence of Vectofusin-1 at the optimal dose of 12µg/ml. Data are shown as the average transduction efficiency (% GFP+). Bars indicate the mean value of the distributions (\*\*p<0.01, paired Student's t-test).
