# Supplementary material for: Vectofusin-1, a New Viral Entry Enhancer, Strongly Promotes Lentiviral Transduction of Human Hematopoietic Stem Cells
Source: PubMed Central journal article supplement — Mol Ther Nucleic Acids. 2013 May 7;2(5):e90–. doi: 10.1038/mtna.2013.17 (PMC4817938; doi:10.1038/mtna.2013.17), 2013-05-07
Supplement: mtna201317x3.pdf [file mtna201317x3.pdf]

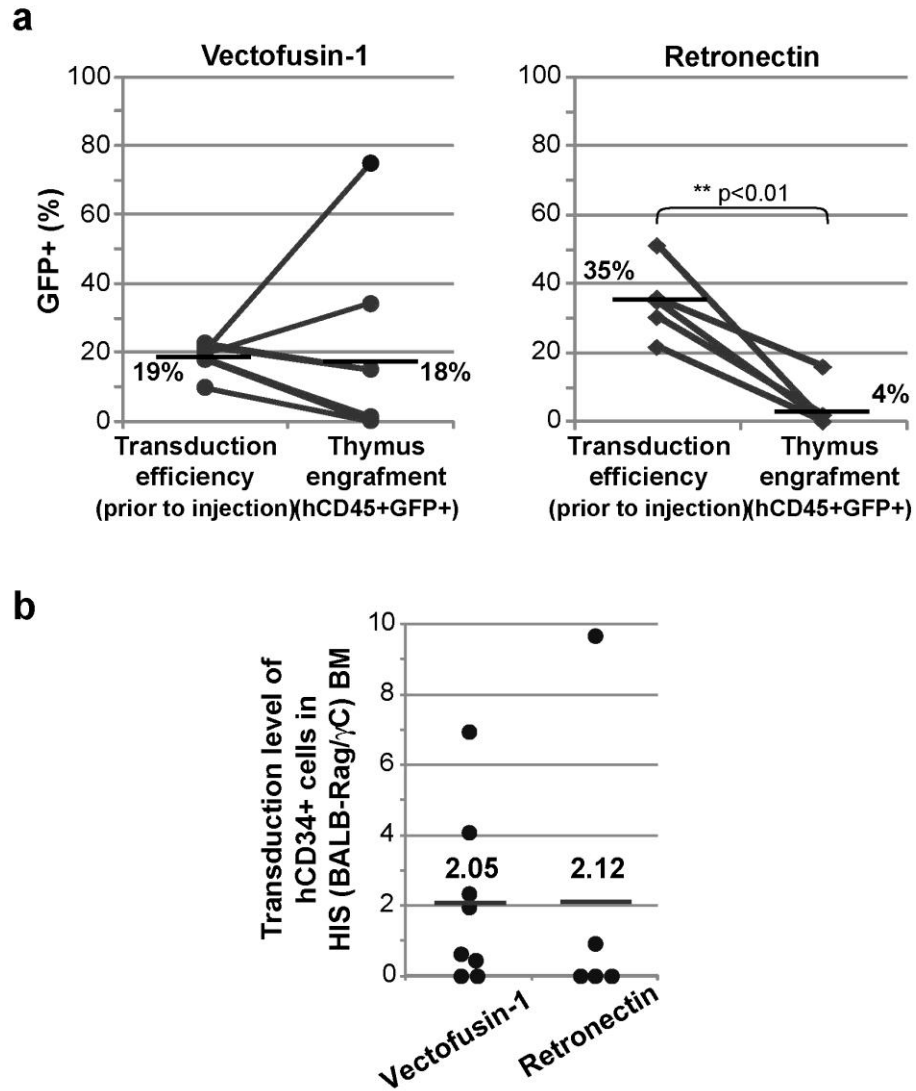

**Figure S3. hCD34<sup>+</sup> transduction levels and engraftment efficiency of transduced cells in HIS (BALB-Rag/gC) mice.** (a) Transduction efficiencies of hCD34<sup>+</sup> cells (% GFP<sup>+</sup>) were obtained 5 days post-transduction and were compared with the level of engraftment of hCD45<sup>+</sup> GFP<sup>+</sup> cells in the thymus of HIS (BALB-Rag/gC) mice after 12 weeks, for cells transduced either in presence of Vectofusin-1 (Left panel) or Retronectin (right panel). Bars indicate the mean value of the distributions (no statistical difference for the Vectofusin-1 condition;  $p < 0.01$  for the Retronectin condition, Mann-Whitney test). (b) Determination of the percentage of hCD34<sup>+</sup> GFP<sup>+</sup> cells in the hCD34<sup>+</sup> population engrafted in the bone marrow (BM) of HIS (BALB-Rag/gC) mice after 12 weeks (no statistical difference, Mann-Whitney test).
