# Supplementary material for: Vectofusin-1, a New Viral Entry Enhancer, Strongly Promotes Lentiviral Transduction of Human Hematopoietic Stem Cells
Source: PubMed Central journal article supplement — Mol Ther Nucleic Acids. 2013 May 7;2(5):e90–. doi: 10.1038/mtna.2013.17 (PMC4817938; doi:10.1038/mtna.2013.17), 2013-05-07
Supplement: mtna201317x4.pdf [file mtna201317x4.pdf]

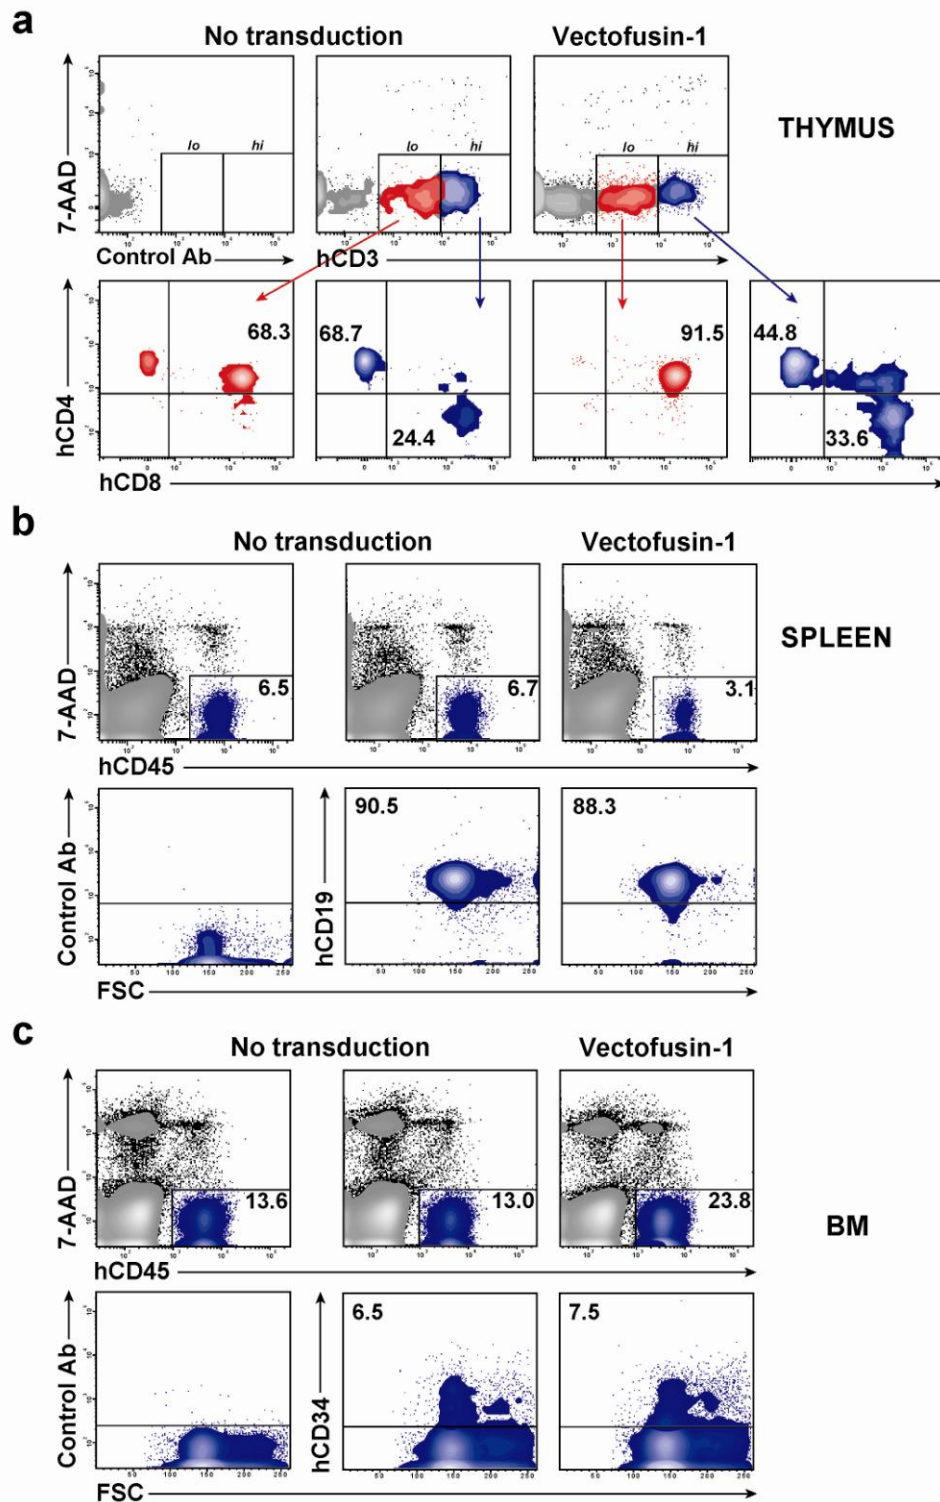

**Figure S4. Monitoring of the engraftment of HIS (BALB-Rag/gC) mice.** Gating strategies used for the analysis of human CD4 and CD8 T cells isolated from the thymus (a); the analysis of human B cells (hCD19) isolated from the spleen (b) and the analysis of human CD34<sup>+</sup> hematopoietic progenitors isolated from the mouse bone marrow (BM) (c).
